# Supplementary material for: Duration of solid fuel cookstove use is associated with increased risk of acute lower respiratory infection among children under six months in rural central India
Source: PubMed Central journal article supplement (PMC6812868; doi:10.1371/journal.pone.0224374), 2019-10-24
Supplement: pone.0224374.s004.pdf [file pone.0224374.s004.pdf]

|                                                                                                                |                                                                                                |                              |
|----------------------------------------------------------------------------------------------------------------|------------------------------------------------------------------------------------------------|------------------------------|
| <b>ग्लोबल नेटवर्क फॉर वूमन अॅन्ड<br/>चिल्ड्रन्स हेल्थ रिसर्च</b>                                               | <b>माता व नवजात शिशु आरोग्य नोंदणी</b><br><b>MNH नोंदणी क्र.</b>  __ __ __   __ __ __ __ __ __ | <b>HAP 01</b>                |
| <b>पान क्र. १</b>                                                                                              | <b>दिनांक</b>  __ __  -  __ __  -  __ __ __ __                                                 | <b>Version 1.1 7/10/2013</b> |
| हे पत्रक, सहभागी (माता) जेथे सध्या राहत आहे तेथे प्रत्यक्ष भेट देवून प्रसुतीच्या १४ व्या दिवसाला भरावयाचे आहे. |                                                                                                |                              |
| <b>अ. घरघुती वैशिष्ट्ये :</b>                                                                                  |                                                                                                |                              |
| <b>० प्रसुतिचा दिनांक :</b>  __ __  -  __ __  -  __ __ __ __                                                   |                                                                                                |                              |
| १. अलीकडे जन्माला आलेल्या बाळाला गृहित धरून तुमच्या कुटुंबात एकुण किती सदस्य राहतात?                           | <b>एकुण सदस्य</b>  __ __                                                                       |                              |
| २. नुकत्याच जन्माला आलेल्या बाळाला गृहित धरून तुमच्या कुटुंबात एकुण किती मुलं ५ वर्षा खालील आहेत?              | <b>५ वर्षा खालील मुलं</b>  __ __                                                               |                              |
| ३. तुमच्या घरात किती खोल्या आहेत?                                                                              | <b>एकुण खोल्या</b>  __ __                                                                      |                              |
| ४. तुमच्या घरात तुम्हाला वगळून कुणी धुम्रपान करतात काय (सिगारेट, बिडी, चिलम)? (एक पर्याय निवडा)                |                                                                                                |                              |
| १.  __  होय, दररोज                                                                                             | २.  __  होय, कधीकधी (दररोज पेक्षा कमी)                                                         | ३.  __  नाही, कधीच नाही      |
| <b>निरिक्षण करा वा विचारा :</b>                                                                                |                                                                                                |                              |
| ५. तुमच्या घरातील तळ जमीन कोणत्या सामुग्री पासून बनविलेली आहे? (एक पर्याय निवडा)                               |                                                                                                |                              |
| १.  __  नैसर्गिक तळ जमीन                                                                                       | २.  __  अविकसीत तळ जमीन                                                                        | ३.  __  पूर्ण तळ जमीन        |
| ६. तुमच्या घराचे छत मुख्यतः कुठल्या सामुग्रीने बनविलेले आहे? (एक पर्याय निवडा)                                 |                                                                                                |                              |
| १.  __  नैसर्गिक छत                                                                                            | २.  __  अविकसित छत                                                                             | ३.  __  पूर्ण छत             |
| ७. तुमच्या घराच्या बाहेरिल भिंती मुख्यतः कोणत्या सामुग्रीच्या आहे? (एक पर्याय निवडा)                           |                                                                                                |                              |
| १.  __  नैसर्गिक भिंत                                                                                          | २.  __  अविकसित भिंत                                                                           | ३.  __  पूर्ण भिंत           |
| ८. कुटुंबातील सदस्या कडे खालील पैकी काय उपलब्ध आहे? होय नाही                                                   |                                                                                                |                              |
| अ. सायकल                                                                                                       | १.  __                                                                                         | २.  __                       |
| ब. मोटरसायकल किंवा स्कूटर                                                                                      | १.  __                                                                                         | २.  __                       |
| क. कार, ट्रक किंवा ट्रॅक्टर                                                                                    | १.  __                                                                                         | २.  __                       |

| ग्लोबल नेटवर्क फॉर वूमन अॅन्ड<br>चिल्ड्रन्स हेल्थ रिसर्च                                                                                                                                                                                                | माता व नवजात शिशु आरोग्य नोंदणी<br>MNH नोंदणी क्र.  __ __ __   __ __ __ __ __ __                                                            |                                                                       | HAP 01                                                               |                                                                       |
|---------------------------------------------------------------------------------------------------------------------------------------------------------------------------------------------------------------------------------------------------------|---------------------------------------------------------------------------------------------------------------------------------------------|-----------------------------------------------------------------------|----------------------------------------------------------------------|-----------------------------------------------------------------------|
| पान क्र. २                                                                                                                                                                                                                                              | दिनांक  __ __  -  __ __  -  __ __ __ __                                                                                                     |                                                                       | Version 1.1 7/10/2013                                                |                                                                       |
| ९. पुढील पैकी कुठल्या सोयी तुमच्या घरी आहे?<br>अ. विज<br>ब. रेडिओ<br>क. टेलिविजन (टि.व्ही.)<br>ड. टेलिफोन<br>इ. रेफ्रीजरेटर (फ्रिज)<br>ई. गादी                                                                                                          | होय<br>१.  __ <br>१.  __ <br>१.  __ <br>१.  __ <br>१.  __ <br>१.  __                                                                        | नाही<br>२.  __ <br>२.  __ <br>२.  __ <br>२.  __ <br>२.  __ <br>२.  __ | होय<br>१.  __ <br>१.  __ <br>१.  __ <br>१.  __ <br>१.  __ <br>१.  __ | नाही<br>२.  __ <br>२.  __ <br>२.  __ <br>२.  __ <br>२.  __ <br>२.  __ |
| १०. तुमच्या घरातील व्यक्तीकडे एकुण किती मोबाईल फोन आहेत?                                                                                                                                                                                                | एकुण मोबाईल फोन  __ __                                                                                                                      |                                                                       |                                                                      |                                                                       |
| ११. तुमच्या कुटुंबातील व्यक्ती मुख्यतः कोणत्या प्रकारच्या शौचालय सुविधेचा वापर करतात?(एक पर्याय निवडा)<br>१.  __  फ्लश, सेप्टिक टँक वा पिट शौचालय<br>३.  __  झाकणाचे पिट शौचालय, सुधारित पिट शौचालय<br>५.  __  बादली<br>७.  __  अन्य (स्पष्टीकरण) _____ | २.  __  फ्लश शौचालय विना गटारासह<br>४.  __  विणा झाकणाचे पिट शौचालय<br>६.  __  सुविधा नाही, मोकळे मैदान, झाडेझुडपे                          |                                                                       |                                                                      |                                                                       |
| १२. तुमच्या कुटुंबातील सदस्याकरिता मुख्यतः पिण्याच्या पाण्याची कुठली सोय उपलब्ध आहे? (एक पर्याय निवडा)<br>१.  __  व्यक्तीगत नळ<br>३.  __  ट्युबवेल, बोरवेल, हापसी, बोरिंग<br>५.  __  असंरक्षित विहिर<br>७.  __  टँकर                                    | २.  __  सार्वजनिक नळ<br>४.  __  संरक्षित विहिर<br>६.  __  पृष्ठभागावरिल पाणी (नदी, तलाव, प्रवाह इत्यादी)<br>८.  __  अन्य (स्पष्टीकरण) _____ |                                                                       |                                                                      |                                                                       |
| १३. कुटुंबातील कुठल्याही सदस्याकडे स्वतःच्या मालकीची शेतजमीन आहे काय?                                                                                                                                                                                   | __  होय                                                                                                                                     | __  नाही                                                              | (प्र.क्र. १५ वर जा)                                                  |                                                                       |
| १४. तुमच्या कुटुंबातील सदस्याकडे स्वतःच्या मालकीची किती एकर शेतजमीन आहे काय?                                                                                                                                                                            | एकर  __ __                                                                                                                                  |                                                                       |                                                                      |                                                                       |
| १५. तुमच्या कुटुंबातील सदस्याकडे स्वतःचे गुरे ढोरे, इतर पशु किंवा कुक्कुटपालनाचा व्यवसाय आहे काय?                                                                                                                                                       | __  होय                                                                                                                                     | __  नाही                                                              |                                                                      |                                                                       |
| १६. तुमच्या कुटुंबाचे वार्षिक उत्पन्न किती आहे? (रुपयां मध्ये)                                                                                                                                                                                          | वार्षिक उत्पन्न  __ __ __ __ __                                                                                                             |                                                                       |                                                                      |                                                                       |

| ग्लोबल नेटवर्क फॉर वूमन अॅन्ड<br>चिल्ड्रन्स हेल्थ रिसर्च                                                                                                                                                                                                                                                                                                                                                                                                                                                                                                                                                                                                                                                                                                                                                                                                                                                                                                                                                                                                                                                                                                                                                                                                                                                                                                                                                                                                                                                                                                                                                                                                                                                                                                                                                                                                                                      | माता व नवजात शिशु आरोग्य नोंदणी<br>MNH नोंदणी क्र.  __ __ __   __ __ __ __ __ __ | HAP 01                |
|-----------------------------------------------------------------------------------------------------------------------------------------------------------------------------------------------------------------------------------------------------------------------------------------------------------------------------------------------------------------------------------------------------------------------------------------------------------------------------------------------------------------------------------------------------------------------------------------------------------------------------------------------------------------------------------------------------------------------------------------------------------------------------------------------------------------------------------------------------------------------------------------------------------------------------------------------------------------------------------------------------------------------------------------------------------------------------------------------------------------------------------------------------------------------------------------------------------------------------------------------------------------------------------------------------------------------------------------------------------------------------------------------------------------------------------------------------------------------------------------------------------------------------------------------------------------------------------------------------------------------------------------------------------------------------------------------------------------------------------------------------------------------------------------------------------------------------------------------------------------------------------------------|----------------------------------------------------------------------------------|-----------------------|
| पान क्र. ३                                                                                                                                                                                                                                                                                                                                                                                                                                                                                                                                                                                                                                                                                                                                                                                                                                                                                                                                                                                                                                                                                                                                                                                                                                                                                                                                                                                                                                                                                                                                                                                                                                                                                                                                                                                                                                                                                    | दिनांक  __ __  -  __ __  -  __ __ __ __                                          | Version 1.1 7/10/2013 |
| <b>ब. मातेची माहिती :</b>                                                                                                                                                                                                                                                                                                                                                                                                                                                                                                                                                                                                                                                                                                                                                                                                                                                                                                                                                                                                                                                                                                                                                                                                                                                                                                                                                                                                                                                                                                                                                                                                                                                                                                                                                                                                                                                                     |                                                                                  |                       |
| <p>१. गर्भावस्थेच्या कालावधीत तुम्ही किती महिने माहेरी किंवा इतर नातेवाईकांकडे राहील्या होत्या?  __  महिने  __  लागू नाही ९९<br/>(जर ० महिने किंवा लागू नसल्यास प्र.क्र. ब. ३ वर जा) (जर ० महिन्या पेक्षा जास्त असल्यास HAP 02 पत्रक भरावा.)</p> <p>२. गर्भावस्थेच्या कालावधीत तुम्ही कुठल्या त्रैमासिकेत तुमच्या माहेरी किंवा इतर घरी राहील्यात? (लागू असलेले सर्व पर्याय निवडा)<br/>१.  __  प्रथम त्रैमासिकेत                      २.  __  व्दितीय त्रैमासिकेत                      ३.  __  तृतीय त्रैमासिकेत</p> <p>३. तुम्ही गर्भवती असतांना किती वेळ धुम्रपान करित होत्या (सिगारेट, बिडी, चिलम) (तुमच्या मागील निरिक्षणवरून कुठलाही एक पर्याय निवडा)<br/>१.  __  दररोज                      २.  __  कधी कधी (दररोज पेक्षा कमी)                      ३.  __  कधीच नाही</p>                                                                                                                                                                                                                                                                                                                                                                                                                                                                                                                                                                                                                                                                                                                                                                                                                                                                                                                                                                                                                                                                                                                |                                                                                  |                       |
| <b>क. स्वयंपाकाच्या पध्दती : मुलाखत जेथे घेण्यात आली तेथील कुटुंबात विचारले जाणारे प्रश्न (जेथे सहभागी (माता) सध्या राहत आहे.)</b>                                                                                                                                                                                                                                                                                                                                                                                                                                                                                                                                                                                                                                                                                                                                                                                                                                                                                                                                                                                                                                                                                                                                                                                                                                                                                                                                                                                                                                                                                                                                                                                                                                                                                                                                                            |                                                                                  |                       |
| <p>१. सध्याच्या परिस्थितीत तुमच्या घरी स्वयंपाक व इतर कामासाठी जसे पाणी तापविणे इत्यादी कामासाठी कुठल्या प्रकारच्या चुलीचा वापर करतात?<br/>(लागू असलेले सर्व पर्याय निवडा)<br/>१.  __  एल.पी.जी.                      २.  __  राँकॅल स्टोव्ह                      ३.  __  इलेक्ट्रीक स्टोव्ह<br/>४.  __  चुल                      ५.  __  ओपन फायर, दगड विटाची चुल                      ६.  __  अन्य (स्पष्टीकरण) _____</p> <p>२. वरिल नमुद केलेल्या चुली पैकी मुख्यतः कुठल्याप्रकाराची चुल तुम्ही स्वयंपाकासाठी वापरता? (एक पर्याय निवडा)<br/>१.  __  एल.पी.जी. (प्र.क्र.४ वर जा)                      २.  __  राँकॅल स्टोव्ह (प्र.क्र.४ वर जा)                      ३.  __  इलेक्ट्रीक स्टोव्ह (प्र.क्र.४ वर जा)<br/>४.  __  चुल                      ५.  __  ओपन फायर, दगड विटाची चुल                      ६.  __  अन्य (स्पष्टीकरण) _____</p> <p>३. स्वयंपाक करतांना या चुली मध्ये तुम्ही मुख्यतः कोणत्या इंधनाचा वापर करता? (लागू असलेले सर्व पर्याय निवडा)<br/>१.  __  लाकूड                      २.  __  झुडुप, पेढ्या, गवत                      ३.  __  शेतातील सर्पण                      ४.  __  शेण<br/>५.  __  दगडी कोळसा                      ६.  __  लाकडी कोळसा                      ७.  __  अन्य (स्पष्टीकरण) _____</p> <p>४. तुम्ही स्वयंपाक मुख्यतः कुठे करता? (एक पर्याय निवडा)<br/>१.  __  घराच्या आत पण वेगळ्या स्वयंपाक घरात                      २.  __  घराच्या आत पण वेगळे स्वयंपाक घर नसलेले<br/>३.  __  मुख्य घराच्या बाहेर वेगळ्या ईमारत वा रुम मध्ये                      ४.  __  घरा बाहेर (प्र.क्र.६ वर जा)</p> <p>५. स्वयंपाक घरातील चुलीचा धूर बाहेर निघण्याचे कुठले स्त्रोत उपलब्ध आहे यांचे निरक्षण कराव? (चित्र दाखवा व लागू असलेले सर्व पर्याय निवडा)<br/>१.  __  चिमणी                      २.  __  खिडकी                      ३.  __  झरोखा                      ४.  __  घराबाहेर उघडणारे दार                      ५.  __  अन्य (स्पष्टीकरण) _____</p> |                                                                                  |                       |
