# Supplementary material for: Duration of solid fuel cookstove use is associated with increased risk of acute lower respiratory infection among children under six months in rural central India
Source: PubMed Central journal article supplement (PMC6812868; doi:10.1371/journal.pone.0224374), 2019-10-24
Supplement: pone.0224374.s006.pdf [file pone.0224374.s006.pdf]

|                                                          |                                                                                   |                       |
|----------------------------------------------------------|-----------------------------------------------------------------------------------|-----------------------|
| ग्लोबल नेटवर्क फॉर वूमन अॅन्ड<br>चिल्ड्रन्स हेल्थ रिसर्च | माता व नवजात शिशु आरोग्य नोंदणी<br>MNH नोंदणी क्र.  __ __ __ __ __ __ __ __ __ __ | HAP 02                |
| पान क्र. २                                               | दिनांक  __ __  -  __ __  -  __ __ __ __                                           | Version 1.1 7/10/2013 |

८. स्वयंपाकाच्या व्यतिरिक्त इतर घरकामासाठी दिवसातून कितीवेळ (तास आणि मिनिटे) तुम्ही चुली जवळ घालवित होतात? |\_\_|\_\_| तास |\_\_|\_\_| मिनिटे  
(टिप:- चुली जवळून एका मिटरच्या अंतरावर) (प्र.क्र.१४ वर जा)
९. स्वयंपाकाच्या व्यतिरिक्त कुठल्या प्रकारची चुल तुम्ही पाणी गरम करण्यासाठी वापरत होतात? (एक पर्याय निवडा)  
१. |\_\_| एल.पी.जी.(प्र.क्र.११ वर जा) २. |\_\_| राँकैल स्टोव्ह(प्र.क्र.११ वर जा) ३. |\_\_| इलेक्ट्रीक स्टोव्ह (प्र.क्र.११ वर जा)  
४. |\_\_| चुल ५. |\_\_| ओपन फायर, दगड विटाची चुल ६. |\_\_| अन्य (स्पष्टीकरण) \_\_\_\_\_
१०. या चुलीसाठी मुख्यतः कुठल्या प्रकारच्या इंधनाचा वापर होत होता? (लागू असलेले सर्व पर्याय निवडा)  
१. |\_\_| लाकूड २. |\_\_| झुडुप, पेंढ्या, गवत ३. |\_\_| शेतातील सर्पण ४. |\_\_| शेण  
५. |\_\_| दगडी कोळसा ६. |\_\_| लाकडी कोळसा ७. |\_\_| अन्य (स्पष्टीकरण) \_\_\_\_\_
११. या चुलीचा वापर मुख्यतः कुठे होत होता? (एक पर्याय निवडा)  
१. |\_\_| घराच्या आत पण वेगळ्या स्वयंपाक घरात २. |\_\_| घराच्या आत पण वेगळे स्वयंपाक घर नसलेले  
३. |\_\_| मुख्य घराच्या बाहेर वेगळ्या ईमारत वा रुम मध्ये ४. |\_\_| घरा बाहेर (प्र.क्र. १३ वर जा)
१२. ह्या चुलीचा धूर बाहेर निघण्याचे कुठले स्रोत उपलब्ध होते? (लागू असलेले सर्व पर्याय निवडा)  
१. |\_\_| चिमणी २. |\_\_| खिडकी ३. |\_\_| झरोखा ४. |\_\_| घराबाहेर उघडणारे दार ५. |\_\_| अन्य (स्पष्टीकरण) \_\_\_\_\_
१३. चुलीचा वापर होत असतांना दिवसातील किती वेळ (तास आणि मिनिटे) तुम्ही ह्या चुलीजवळ घालवित होतात? तास |\_\_|\_\_| मिनिटे |\_\_|\_\_|  
(टिप:- चुली जवळून एका मिटरच्या अंतरावर)
१४. तुमच्या घरात तुम्हाला वगळून कोणी धुम्रपान (सिगारेट, बिडी, चिलम) करीत होते काय?  
१. |\_\_| होय, दररोज २. |\_\_| कधीकधी, दररोज पेक्षा कमी ३. |\_\_| नाही, कधीच नाही

#### ड. संपूर्ण भरलेले नोंदणी पत्रक :

१. पत्रक पूर्ण करण्याचा दिनांक |\_\_|\_\_| - |\_\_|\_\_| - |\_\_|\_\_|\_\_|\_\_|

२. पत्रक पूर्ण करणाऱ्या व्यक्तीचे नांव \_\_\_\_\_

अ. ओळख क्रमांक |\_\_|\_\_|\_\_|\_\_|\_\_|\_\_|
