# Supplementary material for: Duration of solid fuel cookstove use is associated with increased risk of acute lower respiratory infection among children under six months in rural central India
Source: PubMed Central journal article supplement (PMC6812868; doi:10.1371/journal.pone.0224374), 2019-10-24
Supplement: pone.0224374.s008.pdf [file pone.0224374.s008.pdf]

|                                                          |                                                                                  |                       |
|----------------------------------------------------------|----------------------------------------------------------------------------------|-----------------------|
| ग्लोबल नेटवर्क फॉर वूमन<br>अॅन्ड चिल्ड्रन्स हेल्थ रिसर्च | माता व नवजात शिशु आरोग्य नोंदणी<br>MNH नोंदणी क्र:  __ __ __   __ __ __ __ __ __ | HAP 03                |
| पान क्र: 1                                               | दिनांक  __ __  -  __ __  -  __ __ __ __                                          | Version 1.1 7/10/2013 |

हे पत्रक दर दोन आठवड्यांनी भरावयाचे आहे. प्रथम हे पत्रक प्रसुतीच्या १४ व्या दिवसाला भरावयाचे आहे व तदनंतर दर दोन आठवड्यांनी या प्रकारे ६ महिन्यापर्यंत भरावयाचे आहे.

### अ. मृत्युची माहिती :

0. प्रसुतिचा दिनांक : |\_\_|\_\_| - |\_\_|\_\_| - |\_\_|\_\_|\_\_|\_\_| 00 भेट क्र : |\_\_|\_\_|
१. बाळ जिवंत आहे काय? (जर होय तर प्र.क्र. ब १ वर जा, जर नाही तर फक्त विभाग अ भरा) |\_\_| होय |\_\_| नाही
२. बाळ मृत पावले असल्यास मृत्युचा दिनांक |\_\_|\_\_| - |\_\_|\_\_| - |\_\_|\_\_|\_\_|\_\_|
३. बाळ मृत असल्यास आईच्या म्हणण्याप्रमाणे, बाळाच्या मृत्युचे काय कारण होते? (लागू असलेले सर्व पर्याय निवडा)
१. |\_\_| निमोनिया २. |\_\_| अतिसार ३. |\_\_| इनसेफेलाईटीस (मेदूला आलेली सूज)
४. |\_\_| तापाचा आजार ५. |\_\_| अन्य (स्पष्टीकरण)

### ब. अस्वास्थ्यता :

- |                                                                                                                                                                                                                                                                  | होय    | नाही   | माहित नाही       |
|------------------------------------------------------------------------------------------------------------------------------------------------------------------------------------------------------------------------------------------------------------------|--------|--------|------------------|
| १. मागील दोन आठवड्या मध्ये तुमचे बाळ कधी तापाने आजारी होते काय?<br>(जर नाही किंवा माहिती नाही तर प्र.क्र. ब. ३ वर जा)                                                                                                                                            | १.  __ | २.  __ | ३.  __           |
| २. मागील दोन आठवड्या मध्ये तुमच्या बाळाला किती दिवस ताप होता?                                                                                                                                                                                                    |        |        | एकुण दिवस  __ __ |
| ३. मागील दोन आठवड्यामध्ये तुमच्या बाळाला कधी खोकला झाला होता काय?<br>(जर नाही किंवा माहिती नाही तर प्र. क्र. ब.७ वर जा)                                                                                                                                          | १.  __ | २.  __ | ३.  __           |
| ४. मागील दोन आठवड्यामध्ये तुमच्या बाळाला किती दिवस खोकला होता?                                                                                                                                                                                                   |        |        | एकुण दिवस  __ __ |
| ५. जेव्हा तुमचे बाळ खोकल्याने आजारी होते तेव्हा तो/ती नेहमी पेक्षा जास्त गतीने<br>श्वास घेत होते काय किंवा श्वास घ्यायला त्रास होता काय?<br>(टिप : श्वास घेण्यास त्रास म्हणजे श्वास घेताना आवाज येणे किंवा श्वासाची गती जास्त,<br>असल्याने स्तनपानास त्रास होणे) | १.  __ | २.  __ | ३.  __           |
| ६. जेव्हा तुमच्या बाळाला खोकला होता तेव्हा कुठल्याप्रकारची औषधे दिलीत? (लागू असलेले सर्व पर्याय निवडा व उपलब्ध असल्यास, औषधाच्या बाटलीचे<br>नाव तपासा) _____                                                                                                     |        |        |                  |
| १.  __  काही नाही २.  __  प्रतिजैविक ३.  __  मलेरियाची औषधी ४.  __  पॅरासिटामोल (ताप कमी करण्यासाठी) ५.  __  अन्य (स्पष्टीकरण) _____                                                                                                                             |        |        |                  |
| ब औषधीचे नाव _____                                                                                                                                                                                                                                               |        |        |                  |
| क बाळाला किती दिवस औषधे दिली  __ __  दिवस                                                                                                                                                                                                                        |        |        |                  |

| ग्लोबल नेटवर्क फॉर वूमन<br>अँड चिल्ड्रन्स हेल्थ रिसर्च                                                                                                                                                           | माता व नवजात शिशु आरोग्य नोंदणी<br>MNH नोंदणी क्र:  _ _ _ _ _ _ _ _ _ _ _ _ _ _ _ _ | HAP 03                      |                             |
|------------------------------------------------------------------------------------------------------------------------------------------------------------------------------------------------------------------|-------------------------------------------------------------------------------------|-----------------------------|-----------------------------|
| पान क्र: 2                                                                                                                                                                                                       | दिनांक  _ _  -  _ _  -  _ _ _ _ _ _                                                 | Version 1.1 7/10/2013       |                             |
|                                                                                                                                                                                                                  | होय                                                                                 | नाही                        | माहित नाही                  |
| ७. मागील दोन आठवड्या मध्ये तुमच्या बाळाला सर्दी होती काय ? (नाकातून पाणी निघणे वा नाक बंद झाल्यासारखे वाटणे) (जर नाही किंवा माहिती नाही तर प्र.क्र.ब. ९ वर जा)                                                   | १. <input type="checkbox"/>                                                         | २. <input type="checkbox"/> | ३. <input type="checkbox"/> |
| ८. मागील दोन आठवड्या मध्ये तुमच्या बाळाला किती दिवस सर्दी होती ? (नाकातून पाणी निघणे वा नाक बंद झाल्यासारखे वाटणे)                                                                                               |                                                                                     |                             | एकुण दिवस  _ _              |
| ९. मागील दोन आठवड्या मध्ये तुमच्या बाळाला कधी अतिसार झाला होता काय ? (नेहमीच्या शौचापेक्षा वेगळ्या प्रकारच्या शौच होणे जसे तिन वेळापेक्षा जास्त पातळ शौच होणे) (जर नाही किंवा माहिती नाही तर प्र.क्र. क.१ वर जा) | १. <input type="checkbox"/>                                                         | २. <input type="checkbox"/> | ३. <input type="checkbox"/> |
| १०. मागील दोन आठवड्या मध्ये तुमच्या बाळाला किती दिवस अतिसार होता ?                                                                                                                                               |                                                                                     |                             | एकुण दिवस  _ _              |
| ११. तुमच्या बाळाच्या शौचामध्ये रक्त असल्याचे तुम्हाला आढळले काय ?                                                                                                                                                | १. <input type="checkbox"/>                                                         | २. <input type="checkbox"/> | ३. <input type="checkbox"/> |
| १२. आपण आपल्या बाळाला अतिसार प्रारंभ झाल्यापासुन खालील पैकी पेय पिण्यास दिले होते काय ?                                                                                                                          |                                                                                     |                             |                             |
| अ. पातळ पदार्थांचे विशेष पॅकेट (ORS)                                                                                                                                                                             | १. <input type="checkbox"/>                                                         | २. <input type="checkbox"/> | ३. <input type="checkbox"/> |
| ब. सरकारी मान्यताप्राप्त घरघुती द्रवपदार्थ (साखर, मिठ व पाणी चे घोळ)                                                                                                                                             | १. <input type="checkbox"/>                                                         | २. <input type="checkbox"/> | ३. <input type="checkbox"/> |
| <b>क. स्तनपान :</b>                                                                                                                                                                                              |                                                                                     |                             |                             |
|                                                                                                                                                                                                                  | होय                                                                                 | नाही                        |                             |
| १. तुम्ही तुमच्या बाळाला स्तनपान देत आहात का ? (जर नाही तर प्रश्न क्र. ड. १ वर जा)                                                                                                                               | १. <input type="checkbox"/>                                                         | २. <input type="checkbox"/> |                             |
| २. तुम्ही तुमच्या बाळाला निव्वळ स्तनपान देत आहात काय ?                                                                                                                                                           | १. <input type="checkbox"/>                                                         | २. <input type="checkbox"/> |                             |
| टिप : नवजात शिशुला स्तनपान (मागील २४ तासात दिलेले आईचे दुध, त्यक्त दुध किंवा मुलाला अंगावर पाजणारी दाई द्वारे). तसेच ORS, जीवनसत्व किंवा खनिज यांचे थेंब आणि औषधे व्यतिरिक्त काहीच नाही, पाणी सुद्धा न देणे.     |                                                                                     |                             |                             |
