# Supplementary material for: Duration of solid fuel cookstove use is associated with increased risk of acute lower respiratory infection among children under six months in rural central India
Source: PLoS One. 2019 Oct 24;14(10):e0224374. doi: 10.1371/journal.pone.0224374 (PMC6812868; doi:10.1371/journal.pone.0224374)
Supplement: S7 Supporting Information — (PDF) [file pone.0224374.s009.pdf]

## Global Network – Household Air Pollution

Duration of follow up – Date    /    /                      -    Date    /    /

|                                                                                    |                                                                                                                           |                                 |
|------------------------------------------------------------------------------------|---------------------------------------------------------------------------------------------------------------------------|---------------------------------|
| 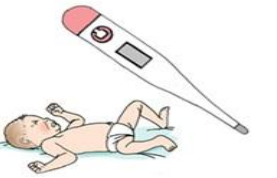   | <div>Fever</div> <div>Wk 1</div> <div>Wk 2</div> <td data-bbox="1346 417 2039 594"> <div>Wk 3</div> <div>Wk 4</div> </td> | <div>Wk 3</div> <div>Wk 4</div> |
| 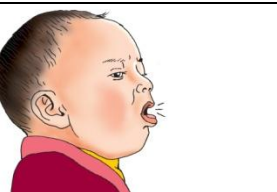   | <div>Cough</div> <div>Wk 1</div> <div>Wk 2</div>                                                                          | <div>Wk 3</div> <div>Wk 4</div> |
| 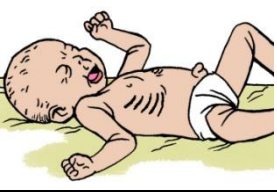   | <div>Difficult breathing</div> <div>Wk 1</div> <div>Wk 2</div>                                                            | <div>Wk 3</div> <div>Wk 4</div> |
| 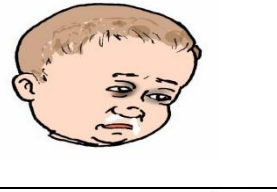  | <div>Runny nose</div> <div>Wk 1</div> <div>Wk 2</div>                                                                     | <div>Wk 3</div> <div>Wk 4</div> |
| 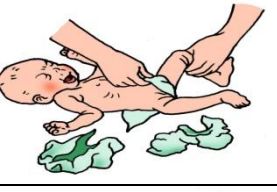 | <div>Diarrhea</div> <div>Wk 1</div> <div>Wk 2</div>                                                                       | <div>Wk 3</div> <div>Wk 4</div> |
| 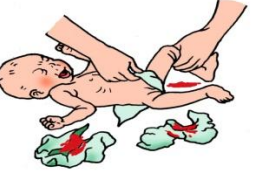 | <div>Blood in stool</div> <div>Wk 1</div> <div>Wk 2</div>                                                                 | <div>Wk 3</div> <div>Wk 4</div> |
